# Supplementary material for: Nano-ordered thin films achieved by soft atmospheric plasma polymerization
Source: Royal Society of Chemistry journal article supplement (doi:10.1039/c2ra21833j), 2012-11-12
Supplement: c2ra21833j.pdf [file c2ra21833j.pdf]

## Nano-ordered thin films achieved by soft plasma polymerization

J. Petersen, C. Becker, T. Fouquet, F. Addiego, V. Toniazzi, A. Dinia and D. Ruch

### Supporting information

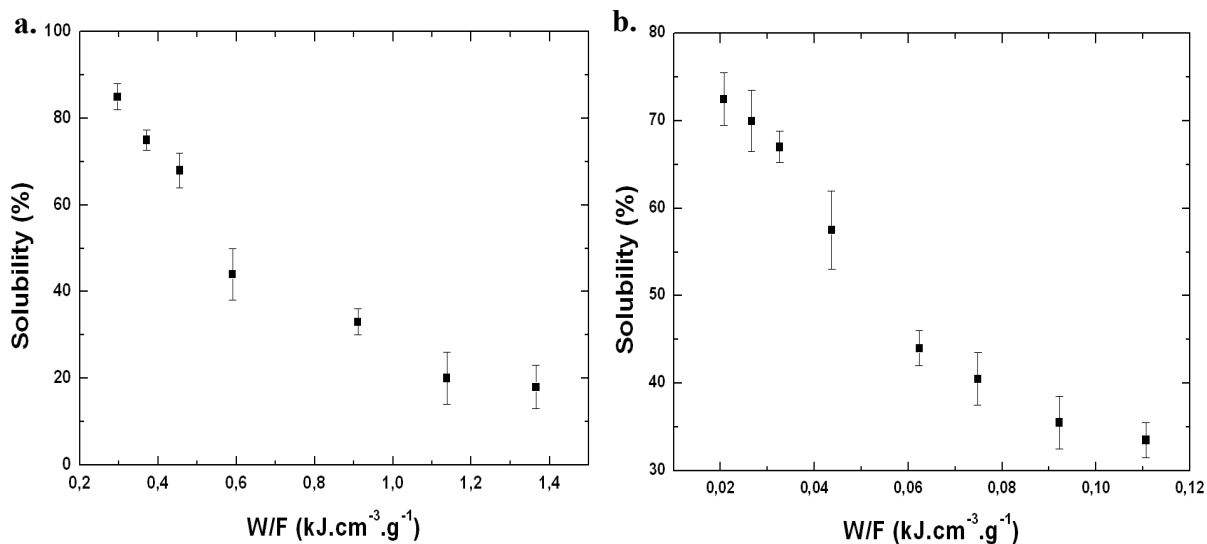

**Figure S1:** Percentage of solubility part according to the energy per molecules units. The measurements have been performed with HFIP and THF solvent for *pp*-PFDA(a) and *pp*-DOCA (b), respectively.

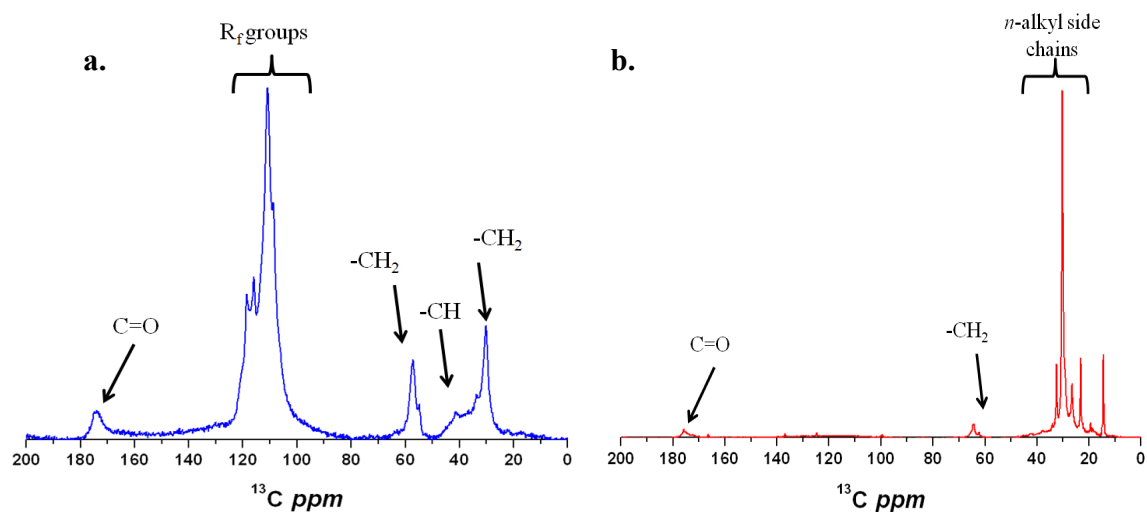

**Figure S2:** <sup>13</sup>C solid state NMR obtained on *pp*-PFDA (a) and *pp*-DOCA(b). Results evidence an extinction of peaks from the ethylenic groups

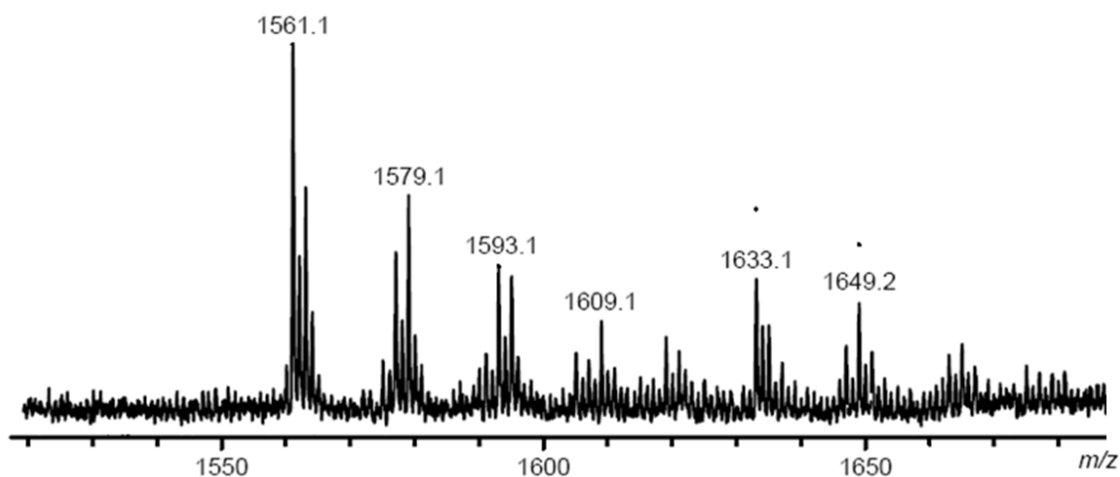

**Figure S3:** High magnification on trimer of pp-PFDA

**Table S1** – Accurate mass measurements of  $[\text{ppPFDA} + \text{Li}]^+$  3-mer pattern (from Fig. S3)

| Assignment                                                                        | Elemental composition                                                         | $(m/z)_{\text{theo}}$ | $(m/z)_{\text{exp}}$ | Error (ppm) |
|-----------------------------------------------------------------------------------|-------------------------------------------------------------------------------|-----------------------|----------------------|-------------|
| PFDA <sub>3</sub> + Li <sup>+</sup>                                               | C <sub>39</sub> H <sub>21</sub> F <sub>51</sub> LiO <sub>6</sub> <sup>+</sup> | 1561.0679             | 1561.0650            | - 1.9       |
| PFDA <sub>3</sub> (H <sub>2</sub> )+Li <sup>+</sup>                               | C <sub>39</sub> H <sub>23</sub> F <sub>51</sub> LiO <sub>6</sub> <sup>+</sup> | 1563.0836             | 1563.0820            | - 1.0       |
| PFDA <sub>3</sub> (O)+Li <sup>+</sup>                                             | C <sub>39</sub> H <sub>21</sub> F <sub>51</sub> LiO <sub>7</sub> <sup>+</sup> | 1577.0628             | 1577.0605            | - 1.5       |
| PFDA <sub>3</sub> (OH <sub>2</sub> )+Li <sup>+</sup>                              | C <sub>39</sub> H <sub>23</sub> F <sub>51</sub> LiO <sub>7</sub> <sup>+</sup> | 1579.0785             | 1579.0740            | - 2.8       |
| PFDA <sub>3</sub> (O <sub>2</sub> )+Li <sup>+</sup>                               | C <sub>39</sub> H <sub>21</sub> F <sub>51</sub> LiO <sub>8</sub> <sup>+</sup> | 1593.0577             | 1593.0558            | - 1.2       |
| PFDA <sub>3</sub> (O <sub>2</sub> H <sub>2</sub> )+Li <sup>+</sup>                | C <sub>39</sub> H <sub>23</sub> F <sub>51</sub> LiO <sub>8</sub> <sup>+</sup> | 1595.0734             | 1595.0710            | - 1.5       |
| PFDA <sub>3</sub> (O <sub>3</sub> H <sub>2</sub> )+Li <sup>+</sup>                | C <sub>39</sub> H <sub>23</sub> F <sub>51</sub> LiO <sub>9</sub> <sup>+</sup> | 1613.0683             | 1611.0670            | - 0.8       |
| PFDA <sub>3</sub> (C <sub>3</sub> H <sub>4</sub> O <sub>3</sub> )+Li <sup>+</sup> | C <sub>42</sub> H <sub>25</sub> F <sub>51</sub> LiO <sub>9</sub> <sup>+</sup> | 1649.0840             | 1649.0800            | - 2.4       |

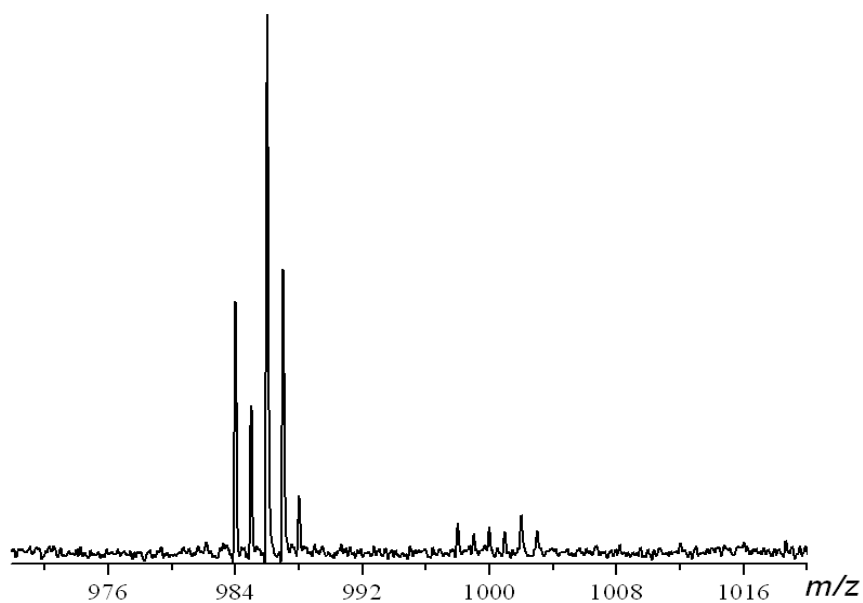

**Figure S4:** High magnification on tetramer of *pp*-DOCA

**Table S2 :** Accurate mass measurements of [*pp*-DOCA+Na]<sup>+</sup> 4-mer pattern (from Fig. S4)

| Assignment                                                            | Elemental composition                                          | ( <i>m/z</i> ) <sub>theo</sub> | ( <i>m/z</i> ) <sub>exp</sub> | Error (ppm) |
|-----------------------------------------------------------------------|----------------------------------------------------------------|--------------------------------|-------------------------------|-------------|
| DOCA <sub>4</sub> + Na <sup>+</sup>                                   | C <sub>60</sub> H <sub>112</sub> NaO <sub>8</sub> <sup>+</sup> | 983,8254                       | 983,8225                      | -2.9        |
| DOCA <sub>4</sub> (H <sub>2</sub> ) + Na <sup>+</sup>                 | C <sub>60</sub> H <sub>112</sub> NaO <sub>8</sub> <sup>+</sup> | 985,8405                       | 985,8397                      | -0.8        |
| DOCA <sub>4</sub> (CH <sub>2</sub> ) + Na <sup>+</sup>                | C <sub>60</sub> H <sub>112</sub> NaO <sub>8</sub> <sup>+</sup> | 997,8405                       | 997,8387                      | -1.8        |
| DOCA <sub>4</sub> (CH <sub>2</sub> H <sub>2</sub> ) + Na <sup>+</sup> | C <sub>60</sub> H <sub>112</sub> NaO <sub>8</sub> <sup>+</sup> | 999,8562                       | 999,855                       | -1.2        |
| DOCA <sub>4</sub> (OHH) + Na <sup>+</sup>                             | C <sub>60</sub> H <sub>112</sub> NaO <sub>8</sub> <sup>+</sup> | 101,8355                       | 1001,832                      | -3.1        |

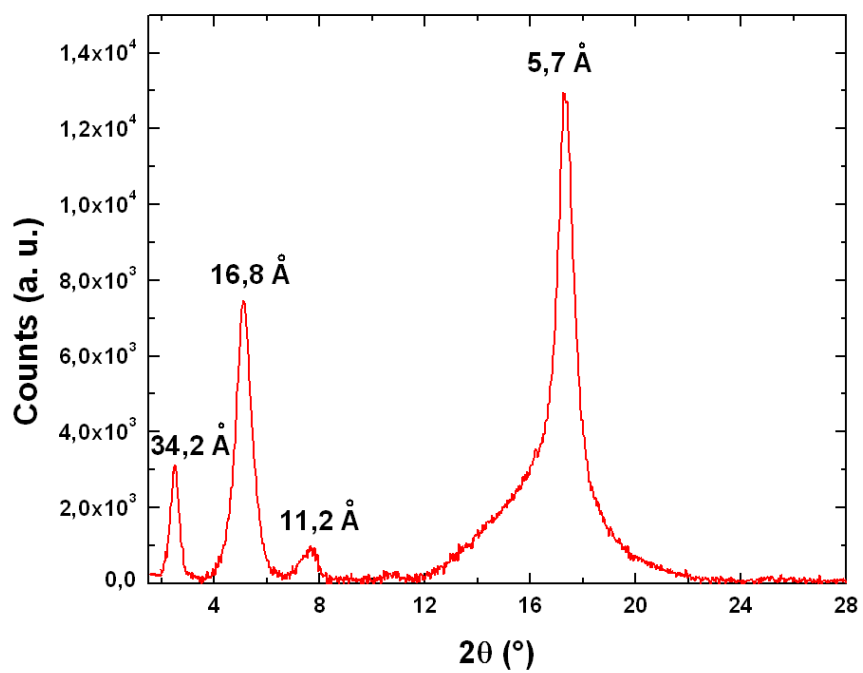

**Figure S5:** X-Ray diffraction measurement performed in transmission mode on *pp*-PFDA at room temperature
